# Supplementary material for: Leishmania 360°: Guidelines for Exosomal Research
Source: MDPI journal article supplement (doi:10.3390/microorganisms9102081), 2021-10-02
Supplement: s1 [file s1]

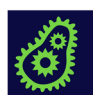

**Supplementary Table S1.** Old and New World *Leishmania* species considered a potential source of animal and human infection without LEVs research previously considered or tested (\*\*\*) open field for future research) [8,20,24,26,27,121].

| Species                       | Geographic Distribution                | Clinical Disease in Humans                                                                                                        | Hosts                                                                                           | Experimental Activatory Stimuli | LEVs Isolation Methods | LEVs type and Sub-Cellular Origin | Size (Mean/Range) | Major LEVs Content | Method of LEVs Analysis |
|-------------------------------|----------------------------------------|-----------------------------------------------------------------------------------------------------------------------------------|-------------------------------------------------------------------------------------------------|---------------------------------|------------------------|-----------------------------------|-------------------|--------------------|-------------------------|
| <i>L. (M.) enriettii</i>      | Present in Brazil                      |                                                                                                                                   | Life cycle remains poorly understood                                                            |                                 |                        |                                   |                   |                    |                         |
|                               |                                        | Human infections undetected. Emerging as new human pathogens, causing VL and CL in HIV <sup>+</sup> and HIV <sup>-</sup> patients | The identity of vectors responsible for transmission has not been confirmed for any species yet | ***                             | ***                    | ***                               | ***               | ***                | ***                     |
|                               |                                        | Prevalence of undiagnosed cases and asymptomatic infections?                                                                      | Infect domestic Guinea pigs. Detected in wildlife kept in captivity.                            |                                 |                        |                                   |                   |                    |                         |
| <i>L. (M.) macropodum</i>     | Present in Australia                   | Human infections undetected. Prevalence of undiagnosed cases and asymptomatic infections?                                         | Life cycle remains poorly understood                                                            | ***                             | ***                    | ***                               | ***               | ***                | ***                     |
|                               |                                        |                                                                                                                                   | Vector: (possibly, Phlebotomine sand fly species and biting midges ( <i>Forcipomyia</i> sp.))   |                                 |                        |                                   |                   |                    |                         |
| <i>L. (M.) martiniquensis</i> | Present in Martinique island, Florida, | CL, DCL, VL                                                                                                                       | Detected in wildlife kept in captivity (Kangaroo species)                                       |                                 |                        |                                   |                   |                    |                         |
|                               |                                        | Prevalence of undiagnosed cases and                                                                                               | Life cycle remains                                                                              | ***                             | ***                    | ***                               | ***               | ***                | ***                     |

|                                                                      |                                                                                  |                                                                          |                                                                                                                       |     |     |     |     |     |     |
|----------------------------------------------------------------------|----------------------------------------------------------------------------------|--------------------------------------------------------------------------|-----------------------------------------------------------------------------------------------------------------------|-----|-----|-----|-----|-----|-----|
|                                                                      | Switzerland, asymptomatic<br>Germany and infections?<br>south-east<br>Asia       | poorly<br>understood                                                     |                                                                                                                       |     |     |     |     |     |     |
|                                                                      |                                                                                  | VL in BALB/c<br>mice                                                     | Vectors (?)<br><br>Detected in<br>human and<br>domestic<br>animals                                                    |     |     |     |     |     |     |
|                                                                      |                                                                                  | CL, DCL, VL                                                              | Life cycle<br>remains<br>poorly<br>understood                                                                         |     |     |     |     |     |     |
| <i>L. (M.)<br/>orientalis</i>                                        | Present in<br>south-east<br>Asia                                                 | Prevalence of<br>undiagnosed<br>cases and<br>asymptomatic<br>infections? | The identity of<br>vectors<br>responsible for<br>transmission<br>has not been<br>confirmed for<br>any species<br>yet. | *** | *** | *** | *** | *** | *** |
|                                                                      |                                                                                  |                                                                          | Detected in<br>humans.                                                                                                |     |     |     |     |     |     |
|                                                                      |                                                                                  | CL                                                                       | Life cycle<br>remains<br>poorly<br>understood                                                                         |     |     |     |     |     |     |
| <i>L. (M.) sp.</i><br>Ghana that is<br>still formally<br>undescribed | Present in<br>Africa                                                             | Prevalence of<br>undiagnosed<br>cases and<br>asymptomatic<br>infections? | The identity of<br>vectors<br>responsible for<br>transmission<br>has not been<br>confirmed for<br>any species<br>yet. | *** | *** | *** | *** | *** | *** |
|                                                                      |                                                                                  |                                                                          | Detected in<br>human.                                                                                                 |     |     |     |     |     |     |
|                                                                      |                                                                                  |                                                                          | Vector:<br>Phlebotomine<br>sand fly<br>species<br>( <i>Phlebotomus</i> )                                              |     |     |     |     |     |     |
| <i>L. (L.)<br/>aethiopica</i>                                        | Highlands of<br>Ethiopia and<br>Kenya,<br>highlands of<br>south-west<br>Ethiopia | CL, DCL,<br>MCL,<br>Chronic<br>oriental sore<br>Zoonotic                 | Infect wild<br>rodents.                                                                                               | *** | *** | *** | *** | *** | *** |

|                         |                                                                                                                                                                                                       |                                                                       |                                                                                                                                          |     |     |     |     |     |     |
|-------------------------|-------------------------------------------------------------------------------------------------------------------------------------------------------------------------------------------------------|-----------------------------------------------------------------------|------------------------------------------------------------------------------------------------------------------------------------------|-----|-----|-----|-----|-----|-----|
|                         |                                                                                                                                                                                                       |                                                                       | Rock hyraxes,<br><i>Procavia</i><br><i>capensis</i> ,<br><i>Heterohyrax</i><br><i>brucei</i><br>(reservoir<br>hosts)                     |     |     |     |     |     |     |
|                         |                                                                                                                                                                                                       |                                                                       | Vector:<br>Phlebotomine<br>sand fly<br>species<br>( <i>Phlebotomus</i> )                                                                 |     |     |     |     |     |     |
| <i>L. (L.) gerbilli</i> | Eastern<br>Russia,<br>Mongolia                                                                                                                                                                        | Human<br>infection<br>unknown                                         | Great gerbil<br><i>Rhombomys</i><br><i>opimus</i><br>(reservoir<br>host)                                                                 | *** | *** | *** | *** | *** | *** |
|                         |                                                                                                                                                                                                       |                                                                       | Vector:<br>Phlebotomine<br>sand fly<br>species<br>( <i>Phlebotomus</i> )                                                                 |     |     |     |     |     |     |
| <i>L. (L.) turanica</i> | Central Asia                                                                                                                                                                                          | Human<br>infection<br>unknown                                         | Great gerbil<br><i>Rhombomys</i><br><i>opimus</i><br>(reservoir<br>host)                                                                 | *** | *** | *** | *** | *** | *** |
|                         |                                                                                                                                                                                                       |                                                                       | Vector:<br>Phlebotomine<br>sand fly<br>species<br>( <i>Phlebotomus</i> )                                                                 |     |     |     |     |     |     |
| <i>L. (L.) arabica</i>  | Saudi Arabia                                                                                                                                                                                          | Human<br>infection<br>unknown                                         | Fat sand-rat<br><i>Psammomys</i><br><i>obesus</i><br>(reservoir<br>host)                                                                 | *** | *** | *** | *** | *** | *** |
|                         |                                                                                                                                                                                                       |                                                                       | Vector:<br>Phlebotomine<br>sand fly<br>species<br>( <i>Phlebotomus</i> )                                                                 |     |     |     |     |     |     |
| <i>L. (L.) tropica</i>  | Central to<br>south-west<br>Asia, North,<br>equatorial and<br>southern<br>Africa, Middle<br>east, Iran,<br>Afghanistan,<br>Sub-Saharan<br>Africa, Kenya,<br>Ethiopia and<br>Namibia.<br>Mediterranean | CL, VL<br>Oriental sore<br>(dry form),<br>leishmaniasis<br>recidivans | Infect wild<br>rodents and<br>wild canids?<br>cats? dogs<br>(CL), and<br>humans.<br><br>Humans are<br>reservoir hosts<br>(peridomestic). | *** | *** | *** | *** | *** | *** |

|                              |                                                                                                                |         |                                                                                                                            |     |     |     |     |     |     |
|------------------------------|----------------------------------------------------------------------------------------------------------------|---------|----------------------------------------------------------------------------------------------------------------------------|-----|-----|-----|-----|-----|-----|
|                              |                                                                                                                |         | Probably rock hyraxes and <i>Procapra capensis</i> .                                                                       |     |     |     |     |     |     |
|                              |                                                                                                                | CL, DCL | Vector:<br>Unknown ( <i>Lutzomyia</i> ?)                                                                                   |     |     |     |     |     |     |
| <i>L. (L.) venezuelensis</i> | Northern Venezuela, in the States of Lara and Yaracuy, Dominican Republic                                      |         | Infect domestic cats? humans? wild and synanthropic rodents? Presumably zoonotic and sylvatic, but reservoir host unknown. | *** | *** | *** | *** | *** | *** |
|                              |                                                                                                                |         | Vector:<br>Phlebotomine sand fly species ( <i>Lutzomyia</i> )                                                              |     |     |     |     |     |     |
| <i>L. (V.) colombiensis</i>  | Colombia, Panama, Colombia, Venezuela, forests of Brazil and Peruvian lowlands, other Latin American countries | CL, VL  | Infect sloths <i>Choloepus hoffmanni</i> (reservoir host) and humans (sylvatic)                                            | *** | *** | *** | *** | *** | *** |
|                              |                                                                                                                |         | Vector:<br>Phlebotomine sand fly species ( <i>Lutzomyia</i> )                                                              |     |     |     |     |     |     |
| <i>L. (V.) lainsoni</i>      | Forested areas of Northern Pará Brazil, Guianas, Peru and Bolivia                                              | CL      | <i>Cuniculus paca</i> (reservoir host)                                                                                     | *** | *** | *** | *** | *** | *** |
|                              |                                                                                                                |         | Presumably zoonotic and sylvatic                                                                                           |     |     |     |     |     |     |
|                              |                                                                                                                |         | Vector:<br>Phlebotomine sand fly species ( <i>Lutzomyia</i> )                                                              |     |     |     |     |     |     |
| <i>L. (V.) lindenbergi</i>   | Degraded forest in Belém, Pará, Brazil                                                                         |         | Infect humans. It is suspected that the wild animal                                                                        | *** | *** | *** | *** | *** | *** |
|                              |                                                                                                                | CL      |                                                                                                                            |     |     |     |     |     |     |

|                           |                                                                      |         |                                                                                                                                                              |     |     |     |     |     |     |
|---------------------------|----------------------------------------------------------------------|---------|--------------------------------------------------------------------------------------------------------------------------------------------------------------|-----|-----|-----|-----|-----|-----|
|                           |                                                                      |         | reservoirs are probably terrestrial                                                                                                                          |     |     |     |     |     |     |
|                           |                                                                      |         | Vector:<br>Phlebotomine sand fly species<br>( <i>Lutzomyia</i> )                                                                                             |     |     |     |     |     |     |
| <i>L. (V.) naiffi</i>     | States of Pará and Amazonas (Brazil), French Guyana, Panama          | CL      | Nine- banded armadillo <i>Dasypus novemcinctus</i> (reservoir host)                                                                                          | *** | *** | *** | *** | *** | *** |
|                           |                                                                      |         | Presumably zoonotic and sylvatic.                                                                                                                            |     |     |     |     |     |     |
|                           |                                                                      |         | Vector:<br>Phlebotomine sand fly species<br>( <i>Lutzomyia</i> )                                                                                             |     |     |     |     |     |     |
| <i>L. (V.) panamensis</i> | South and Central America, West of Andes, northern Venezuela, Panama | CL, MCL | Infect Synanthropic and Neotropical rodents, edentates, marsupials, procyonids, erethizontides, monkeys, hunting dogs and humans (primary forest, zoonotic). | *** | *** | *** | *** | *** | *** |
|                           |                                                                      |         | Sloth <i>Choloepus hoffmanni</i> and probably other animals (reservoir host)                                                                                 |     |     |     |     |     |     |
| <i>L. (V.) peruviana</i>  | South America, Arid valleys of the western Peruvian Andes            | CL, MCL | Vector:<br>Phlebotomine sand fly species<br>( <i>Lutzomyia</i> )                                                                                             | *** | *** | *** | *** | *** | *** |

---

Infect dogs  
(CL) and  
humans.

---

Reservoir  
hosts: Rodents  
(*Phyllotis  
andinum* ?),  
marsupials  
(*Didelphis  
marsupialis* ?)  
and dogs  
(zoonotic).

Transmission  
is thought  
mainly to be  
dependent on  
humans  
(peridomestic  
and sylvatic)

---

1. Centrifugation 2. Filtration, 3. Concentration by ultrafiltration/high molecular weight cut-off filter, 4. Sequential/serial centrifugation 5. Ultracentrifugation, 6. Buoyant density on Optiprep gradient fractionation, 7. Buoyant density on sucrose gradient fractionation, 8. Precipitation by exo-prep kit, 9. Gel exclusion chromatography, 10. Size exclusion chromatography, 11. Dissection/Suspension in PBS FP, flagellar pocket, PM, plasma membrane [8]
